# Supplementary figures and images for: Maximum summer temperatures predict the temperature adaptation of Arctic soil bacterial communities
Source: Copernicus journal article supplement (doi:10.5194/bg-2022-184), 2022-09-12

Results of Pruned Regression tree

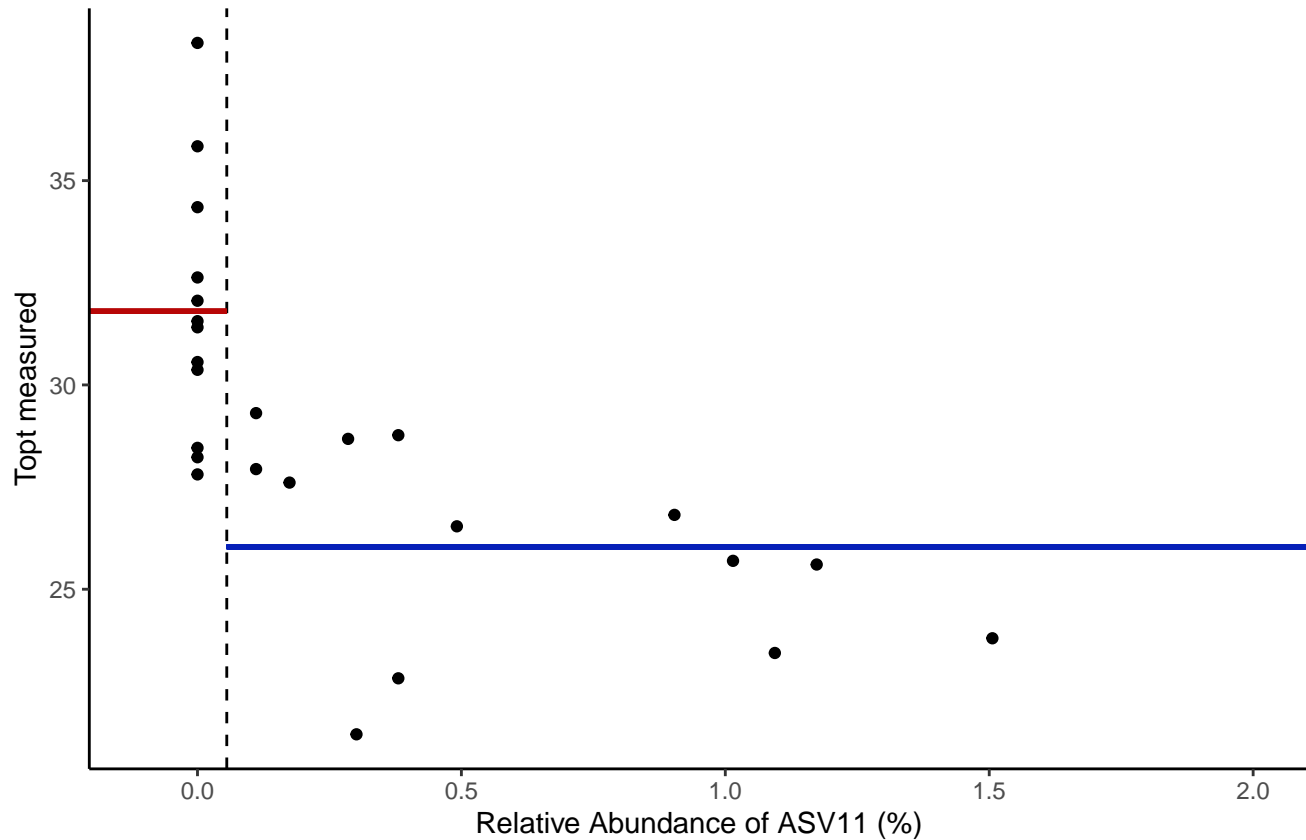

Supplement: Supplementary file 1 [file bg-2022-184-supplement.zip]

# Pruned tree

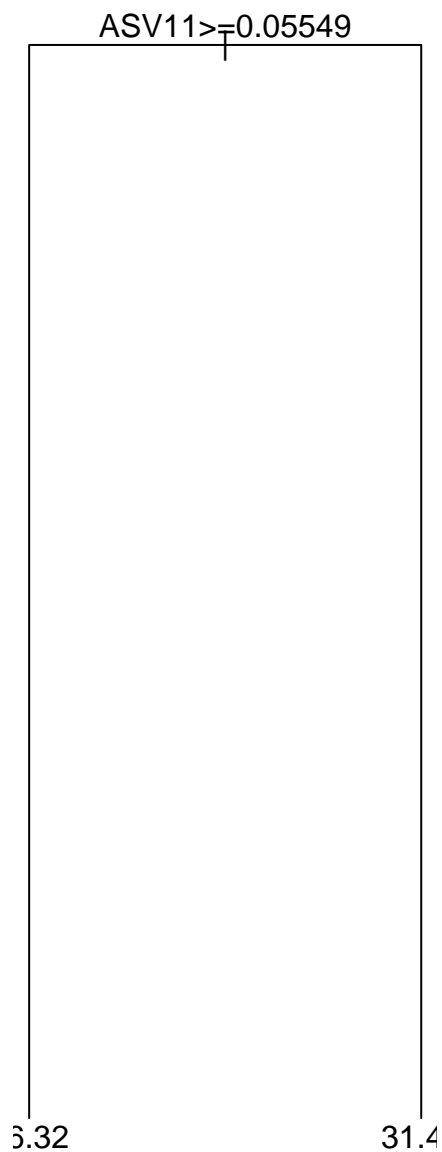

# Full Tree

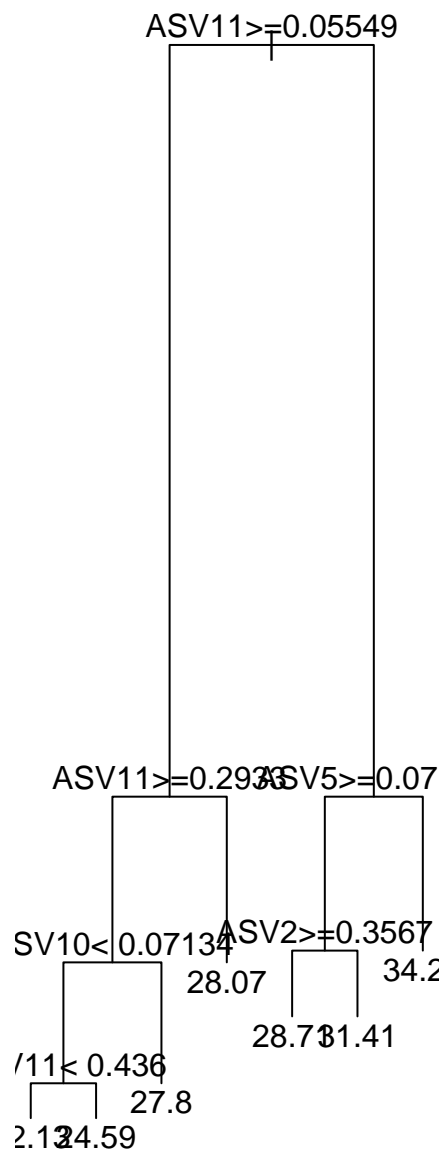

Supplement: Supplementary file 2 [file bg-2022-184-supplement.zip]

Variable Importance per ASV

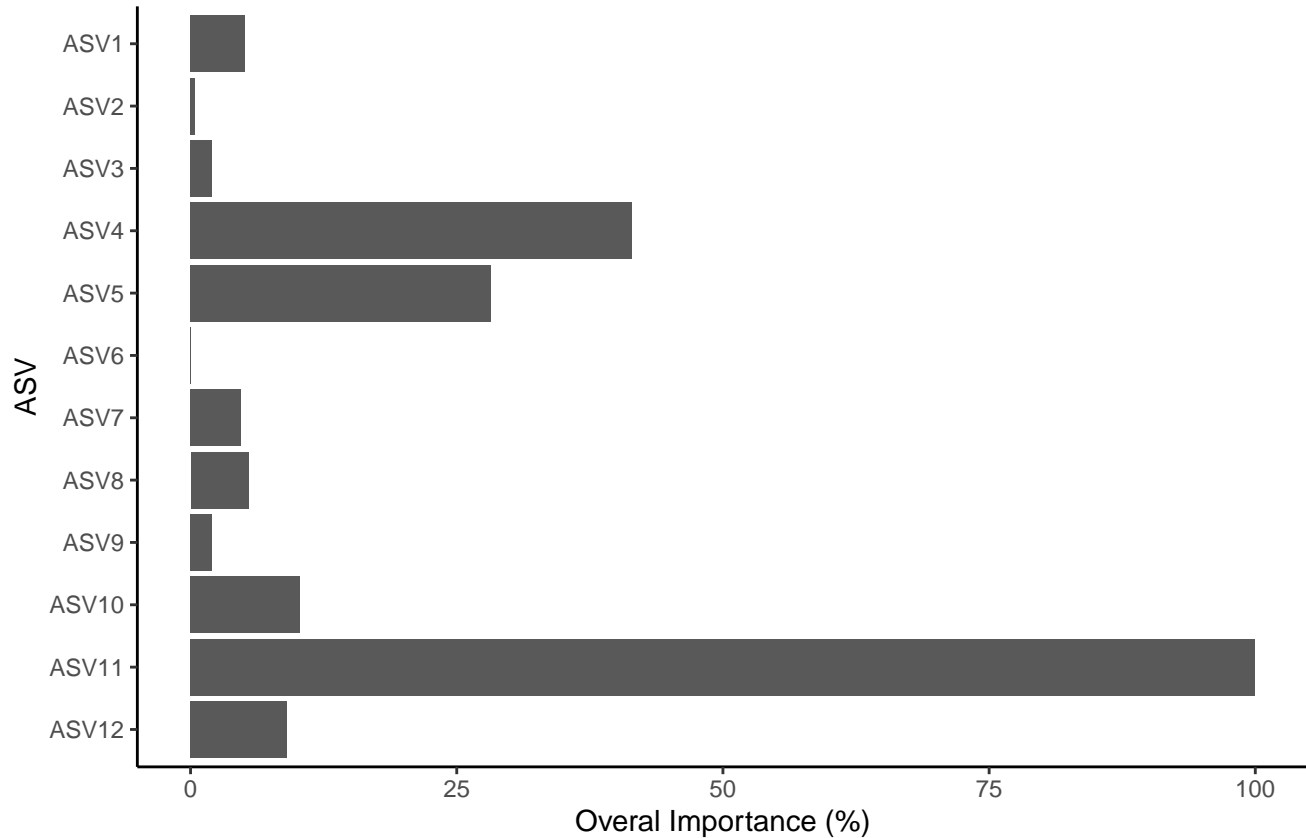

Supplement: Supplementary file 3 [file bg-2022-184-supplement.zip]

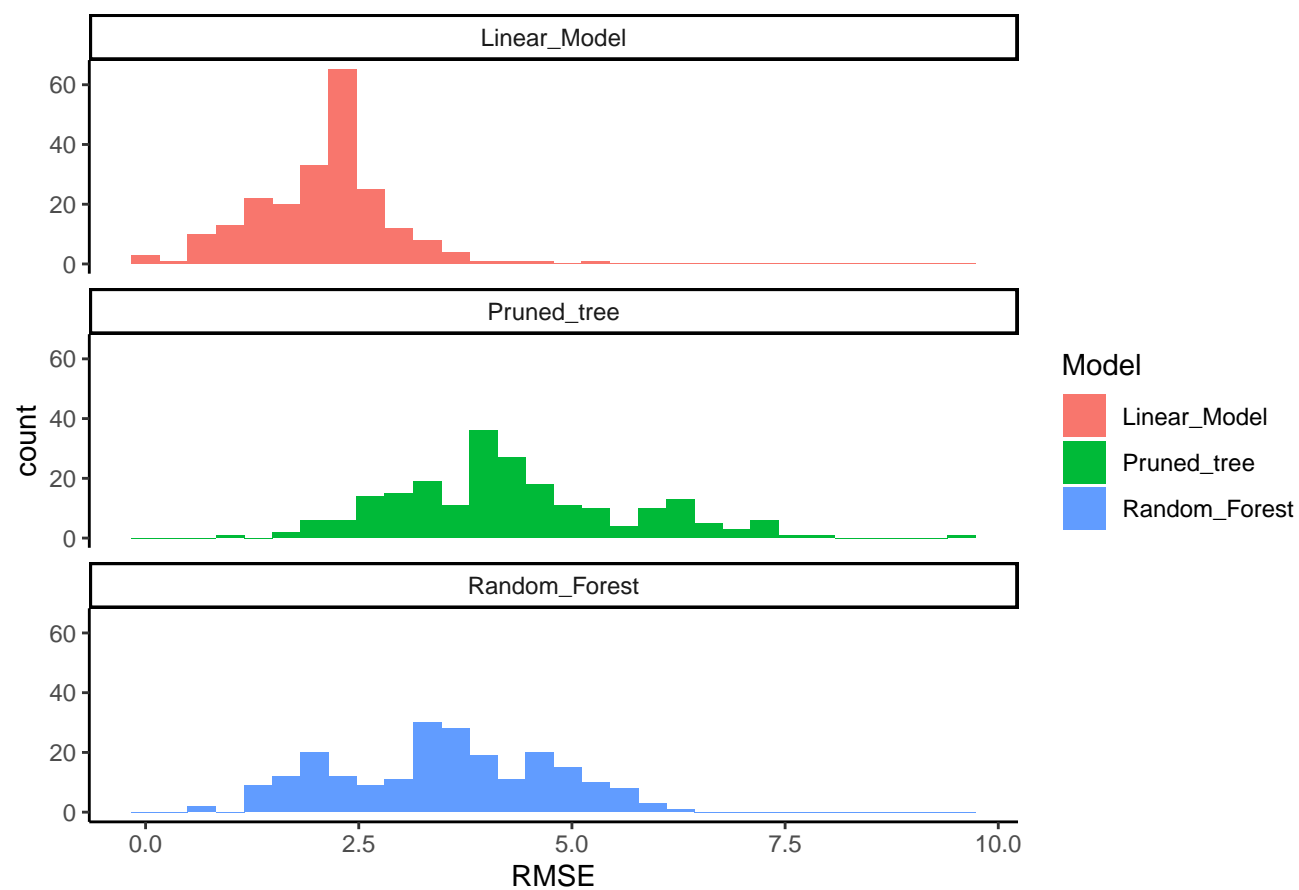

Supplement: Supplementary file 4 [file bg-2022-184-supplement.zip]
